# Supplementary material for: An Economic Analysis of Rebates Conditional on Positive Reviews
Source: Atypon-hosted journal article supplement (doi:10.1287/isre.2021.1048), 2021-11-11
Supplement: isre.2021.1048.sm1.pdf [file isre.2021.1048.sm1.pdf]

# Online Supplement to “An Economic Analysis of Rebates Conditional on Positive Reviews”

Jianqing Chen

The University of Texas at Dallas

chenjq@utdallas.edu

Zhiling Guo

Singapore Management University

zhilingguo@smu.edu.sg

Jian Huang

Nanjing University of Finance and Economics

jianhuangvictor@gmail.com

## A Appendix

### A.1 Proof of Lemma 1

*Proof.* A satisfied consumer posts a positive review if  $v + s \geq c$ ; otherwise, the benefit cannot compensate for the review-posting cost and she does not post.

An unsatisfied consumer posts a negative review only if the review-sharing value,  $v$ , is greater than the value of posting a fake positive review,  $s - m$ , and greater than the review-posting cost  $c$ ; that is,  $v \geq \max\{s - m, c\}$ . An unsatisfied consumer posts a fake positive review only if the benefit of doing so,  $s - m$ , is greater than the value of sharing a true opinion,  $v$ , and greater than the review-posting cost  $c$ ; that is,  $s - m \geq \max\{v, c\}$ . In other cases, unsatisfied consumers post no reviews.  $\square$

### A.2 Proof of Proposition 1

*Proof.* First, the consumers in the first period have the same expected product valuation  $x + y$ , and thus  $p_1^* = x + y$ . Similarly,  $p_2^* = x + 2\hat{\lambda}y$ , where  $\hat{\lambda}$  is a function of  $s$ . Second, we notice that the intermediate-rebate case with  $c \leq s < c + m$  cannot arise in equilibrium. When  $s \in [c, c + m)$ , by

Equation (3),  $n_g$ ,  $n_b$ , and  $n_o$  remain the same for any  $s$ , and so do consumers' perceived expected utilities. Therefore, any  $s \in (c, c + m)$  is dominated by  $s = c$  to maximize the seller's profit. We next consider the low-rebate and high-rebate cases.

**Low-Rebate Case ( $0 \leq s < c$ ).** By  $n_g$ ,  $n_b$ , and  $n_o$  in Equation (4), we have  $\hat{\lambda} = \frac{1}{2} + \frac{s}{4}$ . By substituting  $n_g$ ,  $p_1^*$ , and  $p_2^*$  into Equation (1), we have the seller's profit function:

$$\Pi_l = (x + y) + [x + (1 + \frac{s}{2})y] - s \cdot \frac{1}{2}[1 - (c - s)]. \quad (13)$$

By the first-order condition (i.e., letting  $\frac{\partial \Pi_l}{\partial s} = 0$ ), we have

$$s_l^* = \frac{c+y-1}{2} \text{ and } p_{2l}^* = x + \frac{(3+c+y)y}{4}. \quad (14)$$

Next, we check the constraints  $0 \leq s < c$ . Under the assumption  $y \leq 1$ , we notice that  $s_l^* < c$ , and  $s_l^* \geq 0$  requires that  $c \geq \hat{c} \equiv 1 - y$ . When  $c < \hat{c}$ , because of the concavity of  $\Pi_l$ , the optimal rebate is 0. The optimal second-period price is  $p_{2n}^* = x + y$ , and the optimal profit is  $\Pi_n^* = 2(x + y)$ . When  $c \geq \hat{c}$ ,  $s_l^*$  in Equation (14) is the optimal solution to the constrained optimization problem for the low-rebate case. By substituting  $s_l^*$  into Equation (13), we derive the resulting profit as

$$\Pi_l^* = 2(x + y) + \frac{(c+y-1)^2}{8} = \Pi_n^* + \frac{(c+y-1)^2}{8}. \quad (15)$$

**High-Rebate Case ( $s \geq c + m$ ).** By  $n_g$ ,  $n_b$ , and  $n_o$  in Equation (2), we have  $\hat{\lambda} = \frac{1}{2} + \frac{s-m}{2}$ . By substituting  $n_g$ ,  $p_1^*$ , and  $p_2^*$  into Equation (1), we have the seller's profit function:

$$\Pi_h = (x + y) + [x + (1 + s - m)y] - s \cdot \frac{1}{2}[1 + (s - m)], \quad (16)$$

By the first-order condition (i.e., letting  $\frac{\partial \Pi_h}{\partial s} = 0$ ), we have

$$s_h^* = \frac{m+2y-1}{2} \text{ and } p_h^* = x + \frac{(1-m+2y)y}{2}. \quad (17)$$

Next, we check the constraint  $s \geq c + m$ . Under the assumption  $y \leq 1$ , first, we notice that  $s_h^* - m = \frac{2y-m-1}{2} \leq 1$ , so that  $n_g$ ,  $n_b$ , and  $n_o$  in Equation (2) are well behaved. Further,  $s_h^* \geq c + m$

if  $m \leq \bar{m}(c) \equiv 2y - 1 - 2c$ . Accordingly, when  $m \leq \bar{m}(c)$ ,  $s_h^*$  in Equation (17) is the optimal solution to the constrained optimization problem for the high-rebate case. By substituting  $s_h^*$  into Equation (16), we derive the resulting profit as

$$\Pi_h^* = 2(x + y) + \frac{(m+2y-1)^2 - 8my}{8} = \Pi_n^* + \frac{(m+2y-1)^2 - 8my}{8}, \quad (18)$$

When  $m > \bar{m}(c)$ , because of the concavity of  $\Pi_h$ , the optimal rebate is  $c + m$ , leading to the optimal second-period price  $p_{2hc}^* = x + (1 + c)y$  and the optimal profit as follows:

$$\Pi_{hc}^* = 2(x + y) + \frac{2cy - (1+c)(c+m)}{2} = \Pi_n^* + \frac{2cy - (1+c)(c+m)}{2}. \quad (19)$$

**Globally Optimal Price and Rebate Decisions.** We next compare the optimal solutions in the low-rebate and high-rebate cases to derive the globally optimal prices and rebate. Based on Equations (15), (18), and (19), we can derive that  $\Pi_n^* \geq \Pi_h^*$  if and only if  $m \geq m_1$ ,  $\Pi_n^* \geq \Pi_{hc}^*$  if and only if  $m \geq m_2$ ,  $\Pi_l^* \geq \Pi_h^*$  if and only if  $m \geq m_3$ , and  $\Pi_l^* \geq \Pi_{hc}^*$  if and only if  $m \geq m_4$ , where

$$\begin{cases} m_1 = (\sqrt{2y} - 1)^2 \\ m_2 = \frac{(2y-c-1)c}{1+c} \\ m_3 = 1 + 2y - \sqrt{(1-c)^2 + 2(3+c)y + y^2} \\ m_4 = \frac{c(6y-2) - 5c^2 - (1-y)^2}{4(c+1)} \end{cases} \quad (20)$$

Notice that  $m_1$  and  $\bar{m}$  intersect at  $\sqrt{2y} - 1$ , which is less than  $\hat{c}$  if and only if  $y \leq 3 - \sqrt{5}$ . Accordingly, we next distinguish two cases:

(a) Case with  $y \leq 3 - \sqrt{5}$ : When  $c < \sqrt{2y} - 1$  and  $m \geq m_1$  or when  $c \in [\sqrt{2y} - 1, \hat{c}]$  and  $m \geq m_2$ ,  $s = 0$  is optimal. When  $c > \hat{c}$  and  $m \geq m_4$ ,  $s = s_l^*$  is optimal. In other parameter regions, if  $m \leq \bar{m}(c)$ ,  $s = s_h^*$  is optimal by the definition of  $\bar{m}(c)$ , and  $s = s_{hc}^*$  is optimal otherwise.

(b) Case with  $y > 3 - \sqrt{5}$ : When  $c < \hat{c}$  and  $m \geq m_1$ ,  $s = 0$  is optimal. When  $c \in [\hat{c}, \check{c}]$  and  $m \geq m_3$  or when  $c \geq \check{c}$  and  $m \geq m_4$ ,  $s = s_l^*$  is optimal, where

$$\check{c} = \frac{1}{3}(y - 5 + 2\sqrt{y(y+2)+4}) \quad (21)$$

is the intersection of  $m_3$  and  $\bar{m}$ . In other parameter regions, if  $m \leq \bar{m}(c)$ ,  $s = s_h^*$  is optimal by the definition of  $\bar{m}(c)$ , and  $s = s_{hc}^*$  is optimal otherwise.

Altogether, we can define  $\hat{m}(c)$  as follows:

$$\left\{ \begin{array}{l} \text{when } y \leq 3 - \sqrt{5}, \quad \hat{m}(c) = \begin{cases} m_1 & \text{if } c \leq \sqrt{2y} - 1 \\ m_2 & \text{if } \sqrt{2y} - 1 < c \leq \hat{c} \\ m_4 & \text{if } \hat{c} < c \end{cases} \\ \text{when } y > 3 - \sqrt{5}, \quad \hat{m}(c) = \begin{cases} m_1 & \text{if } c \leq \hat{c} \\ m_3 & \text{if } \hat{c} < c \leq \check{c} \\ m_4 & \text{if } \check{c} < c \end{cases} \end{array} \right. \quad (22)$$

where  $m_i$ ,  $i \in \{1, 2, 3, 4\}$ , is defined in Equation (20), and  $\check{c}$  is defined in Equation (21). Noting whether  $\sqrt{2y} - 1 \leq \hat{c}$  and whether  $\hat{c} \geq \check{c}$  depend on whether  $y \leq 3 - \sqrt{5}$ , we can also organize Equation (22) as Equation (6).  $\square$

### A.3 Proof of Corollary 1

*Proof.* (a) By Equations (20) and (22),  $\hat{m}(c)$  weakly decreases in  $c$  because  $\frac{dm_1}{dc} = 0$ ,  $\frac{dm_2}{dc} = \frac{2y}{(1+c)^2} - 1 < 0$  for  $c > \sqrt{2y} - 1$ ,  $\frac{dm_3}{dc} = \frac{1-c-y}{\sqrt{(1-c)^2 + 2y(3+c)+y^2}} < 0$  for  $c > \hat{c}$ , and  $\frac{dm_4}{dc} = \frac{-1-5c(2+c)+y(4+y)}{4(c+1)^2} < 0$  for  $c > \hat{c}$ .

(b) By Equations (20) and (22), if  $y \leq \frac{1}{2}$ ,  $\hat{m}(c) \leq 0$  for all  $c \in [0, 1]$ , and thus the seller does not offer a high rebate. If  $y > \frac{1}{2}$ , because  $\hat{m}(0) > 0$  and  $\hat{m}(1) < 0$ ,  $\hat{m}(c)$  crosses zero from the positive to the negative side once over  $c \in (0, 1)$ . We distinguish two cases:

(b.1) Case with  $y \leq 3 - \sqrt{5}$ : Notice that  $m_2$  might cross zero at  $2y - 1$  over its support. Therefore, if  $2y - 1 \leq \hat{c} = 1 - y$ , or, equivalently, if  $y \leq \frac{2}{3}$ ,  $\hat{m}(c)$  intersects zero at  $2y - 1$ , beyond which the seller does not offer a high rebate. Otherwise,  $\hat{m}(c)$  intersects zero at the point satisfying  $m_4 = 0$ , leading to  $\bar{c}$  in the corollary, beyond which the seller does not offer a high rebate.

(b.2) Case with  $y > 3 - \sqrt{5}$ : Although  $m_3$  might cross zero at  $y$ ,  $y > \check{c}$  and it is out of its support. Therefore,  $\hat{m}(c)$  intersects zero at the point satisfying  $m_4 = 0$ , leading to  $\bar{c}$  in the corollary, beyond which the seller does not offer a high rebate.  $\square$

## A.4 Proof of Corollary 2

*Proof.* (a) For  $\hat{c}$  in Proposition 1, we have  $\frac{d\hat{c}}{dy} = -1 < 0$ .

By Equations (20) and (22),  $\hat{m}(c)$  increases in  $y$  because  $\frac{\partial m_2}{\partial y} = \frac{2c}{c+1} > 0$  and  $\frac{\partial m_4}{\partial y} = \frac{3c+1-y}{2(c+1)} > 0$ . In addition,  $m_1$  increases in  $y$  for  $y \geq \frac{1}{2}$ . When  $y < \frac{1}{2}$ ,  $\sqrt{2y} - 1 < 0$  and  $m_1$  is irrelevant. Further, we can show  $m_3$  increases in  $y$  because  $\frac{\partial^2 m_3}{\partial y^2} > 0$  and  $\frac{\partial m_3}{\partial y}|_{y=3-\sqrt{5}} > 0$ .

(b) Notice that the seller does not offer a rebate when  $m > \hat{m}(c)$  and  $c < \hat{c}$ . When  $y$  decreases,  $\hat{m}(c)$  decreases and  $\hat{c}$  increases, and thus the firm is more likely not to offer a rebate, or, equivalently, less likely to offer a rebate.

(c) As in the proof of Corollary 1, if  $y \leq \frac{1}{2}$ ,  $\hat{m}(c) \leq 0$  for all  $c \in [0, 1]$ , so the seller does not offer a high rebate.  $\square$

## A.5 Proof of Proposition 2

*Proof.* The equilibrium profits are derived in the proof of Proposition 1 as in Equations (15), (18), and (19).  $\square$

## A.6 Proof of Proposition 3

*Proof.* (a) The proof of Proposition 1 guarantees that the equilibrium profit under the conditional-rebate strategy is higher than that in the benchmark case.

(b) In the benchmark,  $p_{2b}^* = p_{2n}^* = (x + y)$ . By Equation (5),  $p_2^* \geq p_{2n}^*$  because  $\hat{\lambda} > \frac{1}{2}$  when rebates are offered.

In addition, by Equation (5), when  $m \geq \hat{m}(c)$  and  $c > \hat{c}$ ,

$$(p_2^* - s^*) - p_{2n}^* = -\frac{(c+y-1)(2-y)}{4} < 0.$$

When  $m < \hat{m}(c)$  (which is possible only if  $y > \frac{1}{2}$ ) and  $m \leq \bar{m}(c)$ ,

$$(p_2^* - s^*) - p_{2n}^* = \frac{(2y-1)(y-1)-m(1+y)}{2} < 0.$$

When  $m < \hat{m}(c)$  and  $m > \bar{m}(c)$ ,  $(p_2^* - s^*) - p_{2n}^* = -m + c(-1 + y) < 0$ .  $\square$

## A.7 Proof of Proposition 4

*Proof.* (a) By Equation (5),  $\frac{\partial s^*}{\partial c} = \frac{1}{2} > 0$ ,  $\frac{\partial p_2^*}{\partial c} = \frac{y}{4} > 0$ ,  $\frac{\partial s^*}{\partial m} = 0$ , and  $\frac{\partial p_2^*}{\partial m} = 0$ . By Equation (7),  $\frac{\partial \Pi^*}{\partial c} = 0$ , and  $\frac{\partial \Pi^*}{\partial m} = \frac{c+y-1}{4} > 0$  because  $c > \hat{c} = 1 - y$ .

(b) By Equation (5), for  $m \leq \bar{m}(c)$ ,  $\frac{\partial s^*}{\partial c} = 0$ ,  $\frac{\partial p_2^*}{\partial c} = 0$ ,  $\frac{\partial s^*}{\partial m} = \frac{1}{2} > 0$ , and  $\frac{\partial p_2^*}{\partial m} = -\frac{y}{2} < 0$ ; For  $m > \bar{m}(c)$ ,  $\frac{\partial s^*}{\partial c} = 1 > 0$ ,  $\frac{\partial p_2^*}{\partial c} = 1 > 0$ ,  $\frac{\partial s^*}{\partial m} = 0$ , and  $\frac{\partial p_2^*}{\partial m} = 0$ . By Equation (7), for  $m \leq \bar{m}(c)$ ,  $\frac{\partial \Pi^*}{\partial c} = 0$ , and  $\frac{\partial \Pi^*}{\partial m} = \frac{m-1-2y}{4} < 0$ . For  $m > \bar{m}(c)$ ,  $\frac{\partial \Pi^*}{\partial c} = \frac{-1-c}{2} < 0$ , and  $\frac{\partial \Pi^*}{\partial m} = \frac{2y-(c+m)-(1+c)}{2} < 0$  because  $m > \bar{m}(c) = 2y - 1 - 2c$ .  $\square$

## A.8 Proof of Proposition 5

*Proof.* First, in the first period, the seller considers either charging a low price to sell to all consumers (i.e., the low-price strategy) or charging a high price to sell to those with high digital-attribute value only (i.e., the high-price strategy). The optimal profit under the low-price strategy is  $y$  and under the high-price strategy is  $\frac{1}{2}(2x + y)$ . When  $x \geq \frac{y}{2}$ ,  $p_1^* = 2x + y$ . Similarly, in the second period, the seller chooses between the low-price strategy with an optimal price  $2\hat{\lambda}y$  and the high-price strategy with an optimal price  $2x + 2\hat{\lambda}y$ . Second, as in the baseline model, the intermediate-rebate case with  $c \leq s < c + m$  cannot arise in equilibrium. We next consider the low-rebate and high-rebate cases.

**Low-Rebate Case ( $0 \leq s < c$ ).** As in the baseline model, we have  $\hat{\lambda} = \frac{1}{2} + \frac{s}{4}$ . Under the high-price strategy, the seller's profit function is

$$\Pi_l^h = \frac{(2x+y)}{2} + \frac{1}{2}[2x + (1 + \frac{s}{2})y] - s \cdot \frac{1}{4}[1 - (c - s)] \quad (23)$$

By the first-order condition (i.e., letting  $\frac{\partial \Pi_l^h}{\partial s} = 0$ ), we have

$$s_l^h = \frac{c+y-1}{2} \text{ and } p_{2l}^h = 2x + \frac{(3+c+y)y}{4} \quad (24)$$

We now check the constraints  $0 \leq s < c$ . Under the assumption  $y \leq 1$ , we notice that  $s_l^h < c$ , and  $s_l^h \geq 0$  requires that  $c \geq \hat{c} \equiv 1 - y$ . When  $c < \hat{c}$ , because of the concavity of  $\Pi_l^h$ , the optimal rebate is 0. The optimal second-period price is  $p_{2n}^* = 2x + y$ , and the optimal profit is  $\Pi_n^* = 2x + y$ . When  $c \geq \hat{c}$ ,  $s_l^h$  in Equation (24) is the optimal solution to the constrained optimization problem for the

low-rebate high-price case. By substituting  $s_l^h$  into Equation (23), we derive the resulting profit as

$$\Pi_l^h = (2x + y) + \frac{(c+y-1)^2}{16} = \Pi_n^* + \frac{(c+y-1)^2}{16}. \quad (25)$$

Under the low-price strategy, the seller's profit function is

$$\Pi_l^l = \frac{(2x+y)}{2} + (1 + \frac{s}{2})y - \frac{s}{4}[1 - (c - s)] \quad (26)$$

By the first-order condition (i.e., letting  $\frac{\partial \Pi_l^l}{\partial s} = 0$ ), we have

$$s_l^l = \frac{c+2y-1}{2} \text{ and } p_{2l}^l = \frac{(3+c+2y)y}{4}. \quad (27)$$

We now check the constraints  $0 \leq s < c$ . If  $y \geq \frac{1}{2}$ , we notice that  $s_l^l \geq 0$ , and  $s_l^l < c$  requires that  $c \geq c_l = 2y - 1$ . When  $c < c_l$ , because of the concavity of  $\Pi_l$ , the optimal rebate is  $s_{lc}^l = c$ . The optimal second-period price is  $p_{2lc}^l = (1 + \frac{c}{2})y$ , and the optimal profit is  $\Pi_{lc}^l = \frac{2x+3y}{2} + \frac{c(2y-1)}{4}$ . If  $y < \frac{1}{2}$ , we notice that  $s_l^l < c$ , and  $s_l^l > 0$  requires that  $c \geq c'_l = 1 - 2y$ . When  $c < c'_l$ , because of the concavity of  $\Pi_l$ , the optimal rebate is 0. In this case, the low-price strategy is dominated by the high-price strategy. Therefore, the optimal second-period price is  $p_{2n}^* = 2x + y$ , and the optimal profit is  $\Pi_n^* = 2x + y$ . When  $c \geq c_l$  (if  $y \geq \frac{1}{2}$ ) or when  $c \geq c'_l$  (if  $y < \frac{1}{2}$ ),  $s_l^l$  in Equation (27) is the optimal solution to the constrained optimization problem for the low-rebate low-price case. By substituting  $s_l^l$  into Equation (26), we derive the resulting profit as

$$\Pi_l^l = \frac{2x+3y}{2} + \frac{(c+2y-1)^2}{16} \quad (28)$$

We notice that  $\hat{c} > c_l$  if and only if  $y \leq \frac{2}{3}$ , and  $\hat{c} > c'_l$ . Comparing the different cases under low rebates, under the assumptions that  $x \geq \frac{8y+y^2}{16}$  (when  $y \leq \frac{2}{3}$ ) and  $x \geq \frac{4y+7y^2}{16}$  (when  $y > \frac{2}{3}$ ), we can summarize the optimal second-period price and rebate as follows:

$$(p_2^*, s^*) = \begin{cases} (2x + y, 0) & \text{if } c \leq \hat{c} \\ (2x + y + \frac{(c+y-1)y}{4}, \frac{c+y-1}{2}) & \text{if } \hat{c} < c \leq \tilde{c} \\ (y + \frac{(c+2y-1)y}{4}, \frac{c+2y-1}{2}) & \text{if } c > \tilde{c} \end{cases} \quad (29)$$

where  $\tilde{c}$  is defined as in the proposition.

**High-Rebate Case ( $s \geq c + m$ ).** As in the baseline model, we have  $\hat{\lambda} = \frac{1}{2} + \frac{s-m}{2}$ . We consider the cases that the seller optimally chooses a low-price strategy under high rebates. Under a low-price strategy, the seller's profit function is

$$\Pi_h = \frac{2x+y}{2} + (1+s-m)y - s \cdot \frac{1}{4}[1+(s-m)], \quad (30)$$

By the first-order condition (i.e., letting  $\frac{\partial \Pi_h}{\partial s} = 0$ ), we have

$$s_h^* = \frac{m+4y-1}{2} \text{ and } p_h^* = y + \frac{(-m+4y-1)y}{2}. \quad (31)$$

We notice that  $s_h^* \geq c+m$  if  $m \leq \bar{m}(c) \equiv 4y-1-2c$ . Accordingly, when  $m \leq \bar{m}(c)$ ,  $s_h^*$  in Equation (31) is the optimal solution to the constrained optimization problem for the high-rebate case. By substituting  $s_h^*$  into Equation (30), we derive the resulting profit as

$$\Pi_h^* = \frac{2x+3y}{2} + \frac{(m+4y-1)^2-16my}{16} \quad (32)$$

When  $m > \bar{m}(c)$ , because of the concavity of  $\Pi_h$ , the optimal rebate is  $c+m$ , leading to the optimal second-period price  $p_{2hc}^* = y + cy$  and the optimal profit as follows:

$$\Pi_{hc}^* = \frac{2x+3y}{2} + \frac{4cy-(1+c)(c+m)}{4} \quad (33)$$

**Globally Optimal Price and Rebate Decisions.** We next compare the optimal solutions in the low-rebate and high-rebate cases to derive the globally optimal prices and rebate. Based on Equations (25), (28), (32), and (33), we can derive  $\Pi_n^* \geq \Pi_h^*$  if and only if  $m \geq m_1$ ,  $\Pi_l^h \geq \Pi_h^*$  if and only if  $m \geq m_2$ ,  $\Pi_l^h \geq \Pi_{hc}^*$  if and only if  $m \geq m_3$ , and  $\Pi_l^l \geq \Pi_{hc}^*$  if and only if  $m \geq m_4$ , where

$$\begin{cases} m_1 = 1 + 4y - 2\sqrt{4x + 2y} \\ m_2 = 1 + 4y - \sqrt{(c + y - 1)^2 + 16x + 8y} \\ m_3 = \frac{c(14y-2)-1-5c^2-16x+(10-y)y}{4(1+c)} \\ m_4 = \frac{c(12y-2)-5c^2-(1-2y)^2}{4(1+c)} \end{cases}$$

Notice that  $m_4$  and  $\bar{m}$  intersect at  $c^* = \frac{-5+2y+4\sqrt{1+y+y^2}}{3}$ , which is less than  $\tilde{c}$  if and only if  $x > \frac{8y+13y^2+8y\sqrt{1+y+y^2}}{48}$ . We can verify that  $\frac{4y+7y^2}{16} < \frac{8y+13y^2+8y\sqrt{1+y+y^2}}{48}$ . Therefore, under the condition specified in the proposition, when  $c < \hat{c}$  and  $m \geq m_1$ ,  $s^* = 0$ ; when  $\hat{c} \leq c < \tilde{c}$  and  $m \geq \tilde{m}(c)$ ,  $s^* = s_l^h$ ; when  $c > \tilde{c}$  and  $m \geq m_4$ ,  $s^* = s_l^l$ . In other parameter regions (i.e., if  $m < \tilde{m}(c)$ ), if  $m \leq \bar{m}(c)$ ,  $s^* = s_h^*$ , and  $s^* = s_{hc}^*$  otherwise. We can then similarly define  $\hat{m}(c)$  as follows:

$$\hat{m}(c) = \begin{cases} 1 + 4y - 2\sqrt{4x + 2y} & \text{if } c \leq \hat{c} \\ 1 + 4y - \sqrt{(c + y - 1)^2 + 16x + 8y} & \text{if } \hat{c} < c \leq c^* \\ \frac{c(14y-2) - 1 - 5c^2 + 16x + (10-y)y}{4(1+c)} & \text{if } c^* < c \leq \tilde{c} \\ \frac{c(12y-2) - 5c^2 - (1-2y)^2}{4(1+c)} & \text{if } c > \tilde{c} \end{cases} \quad (34)$$

□

## A.9 Proof of Proposition 6

*Proof.* Under a low rebate or no rebate, social welfare is formulated in Equation (9). Under a high rebate, when consumers with both high and low digital-attribute value purchase the product, social welfare can be formulated as

$$\left[ \frac{1}{2}(2x + y) + (x + y) \right] + \frac{1}{4} \int_0^1 (v - c) dv + \frac{1}{4} \int_{s-m}^1 (v - c) dv + \frac{1}{4} \int_0^{s-m} (-c - m) dv \quad (35)$$

Consumer surplus is computed as social welfare minus the seller's profit (as in the proof of Proposition 5). By substituting  $(p^*, s^*)$  from Equation (8) into Equations (9) and (35) and by simple algebra, we can derive equilibrium social welfare and consumer surplus,  $(sw^*, cs^*)$ , as follows.

$$\left\{ \begin{array}{ll} \left( 2x + y + \frac{(1-c)^2}{4}, \frac{(1-c)^2}{4} \right) & \text{if } m \geq \hat{m}(c) \text{ and } c \leq \hat{c} \\ \left( 2x + y + \frac{(1-c)^2}{4} - \frac{(c+y-1)^2}{32}, \frac{(1-c)^2}{4} - \frac{3(c+y-1)^2}{32} \right) & \text{if } m \geq \hat{m}(c) \text{ and } \hat{c} < c \leq \tilde{c} \\ \left( \frac{7(1-c)^2 + 64x + 4y(13-c-y)}{32}, \frac{5(1-c)^2 + 32x + 12y(1-y-c)}{32} \right) & \text{if } m \geq \hat{m}(c) \text{ and } c > \tilde{c} \\ \left( \frac{7-16c+3m^2+2m+64x+8y(7-2y-m)}{32}, \frac{5+6m+m^2-16c+8(m+3)y+32x-48y^2}{32} \right) & \text{if } m < \hat{m}(c) \text{ and } m \leq \bar{m}(c) \\ \left( \frac{2(1+8x+6y)-c(4+c+2m)}{8}, \frac{2(1+m+4x)-c(2-c+8y)}{8} \right) & \text{otherwise} \end{array} \right.$$

Note that the first case is equivalent to the benchmark case. We use subscript  $b$  to denote the results under the benchmark case. The second and third cases are those in which the seller offers a low rebate in equilibrium, and the fourth and fifth are those in which the seller offers a high rebate.

(a) When  $m \geq \hat{m}(c)$  and  $\hat{c} < c \leq \tilde{c}$ , it is easy to see that  $sw^* < sw_b^*$  and  $cs^* < cs_b^*$ .

When  $m \geq \hat{m}(c)$  and  $c > \tilde{c}$ , we have

$$\frac{\partial(sw^* - sw_b^*)}{\partial c} = \frac{1-c-2y}{16} < 0 \text{ and } \frac{\partial(cs^* - cs_b^*)}{\partial c} = -\frac{3(-1+c+2y)}{16} < 0$$

In addition,  $(sw^* - sw_b^*)|_{c=1} = \frac{(4-y)y}{8} > 0$ , and  $(cs^* - cs_b^*)|_{c=1} = \frac{8x-3y^2}{8} > 0$ . Therefore,  $sw^* > sw_b^*$ , and  $cs^* > cs_b^*$ .

(b) When  $m < \hat{m}(c)$  and  $m \leq \bar{m}(c)$ , we have  $\frac{\partial(sw^* - sw_b^*)}{\partial c} = -\frac{c}{2} < 0$ , and

$$(sw^* - sw_b^*)|_{c=\bar{m}^{-1}(m)} = \frac{m^2 + (8y-2)m - 3 + 8(5-6y)y}{32}$$

We can verify that  $(sw^* - sw_b^*)|_{c=\bar{m}^{-1}(m)}$  increases in  $m$  in the high-rebate low-price equilibrium and is positive at  $m = 0$ . Therefore,  $sw^* > sw_b^*$ . Moreover,

$$cs^* - cs_b^* = \frac{1}{32} (-8c^2 + m^2 + m(8y + 6) + 32x - 3(1 - 4y)^2)$$

which is positive if and only if  $c < \frac{\sqrt{m^2 + m(8y+6) + 32x - 3(1-4y)^2}}{2\sqrt{2}} \equiv \bar{c}_{cs}^*$ .

When  $m < \hat{m}(c)$  and  $m > \bar{m}(c)$ , we have  $sw^* - sw_b^* = \frac{1}{8} (-3c^2 - 2cm + 4y)$ , which is positive if and only if  $c < \frac{-m + \sqrt{m^2 + 12y}}{3}$ . Moreover,

$$cs^* - cs_b^* = \frac{1}{8} [2(m + 4x) - c(c + 8y - 2)]$$

which is positive if and only if  $c < \sqrt{2m + 8x + (4y - 1)^2} - 4y + 1 \equiv \bar{c}_{cs}^{**}$ .

We notice that  $\bar{c}_{cs}^*$  and  $\bar{c}_{cs}^{**}$  intersect with  $\bar{m}$  at  $1 + 12y - 2\sqrt{8x + 16y(y + 1)} - 1$ . Combining the conditions in these two cases, we conclude that  $cs^* > cs_b^*$  if and only if  $c < \bar{c}_{cs}$ , where

$$\bar{c}_{cs} = \begin{cases} \frac{\sqrt{m^2 + m(8y+6) + 32x - 3(1-4y)^2}}{2\sqrt{2}} & \text{if } m < 1 + 12y - 2\sqrt{8x + 16y(y + 1)} - 1 \\ \sqrt{2m + 8x + (4y - 1)^2} - 4y + 1 & \text{otherwise} \end{cases} \quad (36)$$

□

## Proof of Proposition 7

*Proof.* Review-posting behavior of the consumers in the first period remains the same as in the baseline model. We next consider the review-posting behavior of early arrivals in the second period. A satisfied early arrival derives value  $v - 2ky(\hat{\lambda} - \frac{1}{2})$  by sharing true opinion with review-posting cost  $c$ . Therefore, satisfied early arrivals with  $v \geq c + 2ky(\hat{\lambda} - \frac{1}{2})$  post positive reviews, and the others post no reviews. An unsatisfied early arrival derives value  $v + 2ky(\hat{\lambda} - \frac{1}{2})$  by sharing true opinions with cost  $c$ . Therefore, unsatisfied early arrivals with  $v \geq c - 2ky(\hat{\lambda} - \frac{1}{2})$  post negative reviews, and the others post no reviews. As a result, the numbers of early arrivals who post positive, negative, and no reviews are

$$n'_g = \frac{\theta}{2}[1 - (c + 2ky(\hat{\lambda} - \frac{1}{2}))], n'_b = \frac{\theta}{2}[1 - (c - 2ky(\hat{\lambda} - \frac{1}{2}))], \text{ and } n'_o = \theta - n'_g - n'_b \quad (37)$$

The rest of the proof is similar to that of Proposition 1. We next provide a sketch of the proof, highlighting the differences. The seller's optimal first-period price remains the same as  $p_1^* = x + y$ . We denote  $\hat{\lambda}'$  as late arrivals' perceived likelihood of being satisfied. In the second-period,  $p_2^* = x + 2\hat{\lambda}'y$ , because late arrivals have lower perceived likelihood than early arrivals due to the negative effect of review manipulation.

**Low-Rebate Case** ( $0 \leq s < c$ ). As in the baseline model,  $\hat{\lambda} = \frac{1}{2} + \frac{s}{4}$ . By Equations (4) and (37), we have

$$\hat{\lambda}' = \frac{n_g + n'_g + 0.5(n_o + n'_o)}{1 + \theta} = \frac{1}{2} + \frac{s(1 - ky\theta)}{4(1 + \theta)} = \frac{1}{2} + \frac{\phi s}{4}$$

where  $\phi \equiv \frac{1 - ky\theta}{1 + \theta}$ . We thus have the seller's profit function:

$$\Pi_l = (x + y) + [x + (1 + \frac{\phi s}{2})y] - s \cdot \frac{1}{2}[1 - (c - s)] \quad (38)$$

By the first-order condition, we have

$$s_l^* = \frac{c + \phi y - 1}{2} \text{ and } p_{2l}^* = x + y + \frac{(-1 + c + \phi y)\phi y}{4} \quad (39)$$

We can similarly derive  $\hat{c} \equiv 1 - \phi y$  which segments the regions with low rebates and no rebates. If  $c < \hat{c}$ , the optimal rebate is 0,  $p_{2n}^* = x + y$ , and  $\Pi_n^* = 2(x + y)$ . If  $c \geq \hat{c}$ ,  $s_l^*$  in Equation (39) is the optimal rebate, resulting in the optimal profit

$$\Pi_l^* = 2(x + y) + \frac{(c + \phi y - 1)^2}{8} = \Pi_n^* + \frac{(c + \phi y - 1)^2}{8} \quad (40)$$

**High-Rebate Case ( $s \geq c + m$ ).** As in the baseline model,  $\hat{\lambda} = \frac{1}{2} + \frac{s-m}{2}$ . By Equations (4) and (37), we have

$$\hat{\lambda}' = \frac{n_g + n'_g + 0.5(n_o + n'_o)}{1 + \theta} = \frac{1}{2} + \frac{(1 - ky\theta)(s - m)}{2(1 + \theta)} = \frac{1}{2} + \frac{\phi(s - m)}{2}$$

We thus have the seller's profit function

$$\Pi_h = (x + y) + [x + y + \phi(s - m)y] - s \cdot \frac{1}{2}[1 + (s - m)] \quad (41)$$

By the first-order condition, we have

$$s_h^* = \frac{m + 2\phi y - 1}{2} \text{ and } p_h^* = x + y + \frac{(-m + 2\phi y - 1)\phi y}{2} \quad (42)$$

We can similarly derive  $\bar{m}(c) \equiv 2\phi y - 1 - 2c$  which segments the regions with a corner solution and a interior solution. When  $m \leq \bar{m}(c)$ ,  $s_h^*$  in Equation (42) is the optimal rebate, resulting in the optimal profit with the interior solution

$$\Pi_h^* = 2(x + y) + \frac{(m + 2\phi y - 1)^2 - 8m\phi y}{8} = \Pi_n^* + \frac{(m + 2\phi y - 1)^2 - 8m\phi y}{8} \quad (43)$$

When  $m > \bar{m}(c)$ , the optimal rebate is  $c + m$ , leading to the optimal second-period price  $p_{2hc}^* = x + y + c\phi y$  and the optimal profit with the corner solution

$$\Pi_{hc}^* = 2(x + y) + \frac{2c\phi y - (1 + c)(c + m)}{2} = \Pi_n^* + \frac{2c\phi y - (1 + c)(c + m)}{2} \quad (44)$$

**Globally Optimal Price and Rebate Decisions.** We can derive that  $\Pi_n^* \geq \Pi_h^*$  if and only if  $m \geq m_1$ ,  $\Pi_n^* \geq \Pi_{hc}^*$  if and only if  $m \geq m_2$ ,  $\Pi_l^* \geq \Pi_h^*$  if and only if  $m \geq m_3$ , and  $\Pi_l^* \geq \Pi_{hc}^*$  if and

only if  $m \geq m_4$ , where

$$\begin{cases} m_1 = (\sqrt{2\phi y} - 1)^2 \\ m_2 = \frac{(2\phi y - c - 1)c}{1 + c} \\ m_3 = 1 + 2\phi y - \sqrt{(1 - c)^2 + 2(3 + c)\phi y + \phi^2 y^2} \\ m_4 = \frac{c(6\phi y - 2) - 5c^2 - (1 - \phi y)^2}{4(c + 1)} \end{cases} \quad (45)$$

We can then similarly define  $\hat{m}(c)$  as follows:

$$\begin{cases} \text{when } y \leq \frac{3 - \sqrt{5}}{\phi}, \quad \hat{m}(c) = \begin{cases} m_1 & \text{if } c \leq \sqrt{2\phi y} - 1 \\ m_2 & \text{if } \sqrt{2\phi y} - 1 < c \leq \hat{c} \\ m_4 & \text{if } \hat{c} < c, \end{cases} \\ \text{when } y > \frac{3 - \sqrt{5}}{\phi}, \quad \hat{m}(c) = \begin{cases} m_1 & \text{if } c \leq \hat{c} \\ m_3 & \text{if } \hat{c} < c \leq \frac{1}{3}(\phi y - 5 + 2\sqrt{\phi y(\phi y + 2) + 4}) \\ m_4 & \text{if } \frac{1}{3}(\phi y - 5 + 2\sqrt{\phi y(\phi y + 2) + 4}) < c. \end{cases} \end{cases} \quad (46)$$

□

## Proof of Proposition 8

*Proof.* The proof is similar to that of Proposition 7. Note that  $\hat{\lambda}$  in Equation (11) can be simplified to  $\hat{\lambda} = \frac{\alpha(n_g + n_o/2)}{n_g + n_b + n_o} + \frac{1 - \alpha}{2}$ . In the low-rebate and high-rebate cases, we have  $\hat{\lambda} = \frac{1}{2} + \frac{\alpha s}{4}$  and  $\hat{\lambda} = \frac{1}{2} + \frac{\alpha(s - m)}{2}$ , respectively. Therefore,  $\hat{\lambda}$  in this case differs from  $\hat{\lambda}'$  in the proof of Proposition 7 only in the coefficient  $\alpha$ . By replacing  $\phi$  in the proof of Proposition 7 with  $\alpha$ , we have the equilibrium

results. We can similarly define  $\hat{m}(c)$  as follows:

$$\left\{ \begin{array}{l} \text{when } y \leq \frac{3-\sqrt{5}}{\alpha}, \quad \hat{m}(c) = \begin{cases} m_1 & \text{if } c \leq \sqrt{2\alpha y} - 1 \\ m_2 & \text{if } \sqrt{2\alpha y} - 1 < c \leq \hat{c} \\ m_4 & \text{if } \hat{c} < c, \end{cases} \\ \text{when } y > \frac{3-\sqrt{5}}{\alpha}, \quad \hat{m}(c) = \begin{cases} m_1 & \text{if } c \leq \hat{c} \\ m_3 & \text{if } \hat{c} < c \leq \frac{1}{3}(\alpha y - 5 + 2\sqrt{\alpha y(\alpha y + 2) + 4}) \\ m_4 & \text{if } \frac{1}{3}(\alpha y - 5 + 2\sqrt{\alpha y(\alpha y + 2) + 4}) < c. \end{cases} \end{array} \right. \quad (47)$$

□

## Proof of Proposition 9

*Proof.* As in the baseline model,  $p_1^* = x + 2\lambda y$  and  $p_2^* = x + 2\hat{\lambda}y$ , where  $\hat{\lambda}$  is a function of  $s$ . We next consider the low-rebate and high-rebate cases.

**Low-Rebate Case ( $0 \leq s < c$ ).** As in the baseline model, we have  $\hat{\lambda} = \lambda(1 + s - \lambda s)$ , and the seller's profit function is

$$\Pi_l = (x + 2\lambda y) + [x + 2\lambda(1 + s - \lambda s)y] - s \cdot \lambda[1 - (c - s)] \quad (48)$$

By the first-order condition (i.e., letting  $\frac{\partial \Pi_l}{\partial s} = 0$ ), we have

$$s_l^* = \frac{c+2(1-\lambda)y-1}{2} \text{ and } p_{2l}^* = x + \lambda y[1 - c\lambda + c + \lambda + 2(1 - \lambda)^2 y] \quad (49)$$

Similar to that in the baseline model,  $s_l^* < c$  under the assumption  $\lambda \geq \frac{1}{3}$ , and  $s_l^* \geq 0$  requires that  $c \geq \hat{c} \equiv 1 - 2(1 - \lambda)y$ . When  $c < \hat{c}$ , the optimal rebate is 0, the optimal second-period price  $p_{2n}^* = x + 2\lambda y$ , and the optimal profit is  $\Pi_n^* = 2x + 4\lambda y$ . When  $c \geq \hat{c}$ ,  $s_l^*$  in Equation (49) is the optimal solution to the constrained optimization problem for the low-rebate case. By substituting  $s_l^*$  into Equation (48), we derive the resulting profit as

$$\Pi_l^* = 2x + 4\lambda y + \frac{\lambda}{4}[c + 2(1 - \lambda)y - 1]^2 \quad (50)$$

**High-Rebate Case ( $s \geq c + m$ ).** As in the baseline model, we have  $\hat{\lambda} = \lambda + (1 - \lambda)(s - m)$ , and the seller's profit function is

$$\Pi_h = (x + 2\lambda y) + [x + 2\lambda y + 2(1 - \lambda)(s - m)y] - s \cdot [\lambda + (1 - \lambda)(s - m)] \quad (51)$$

By the first-order condition (i.e., letting  $\frac{\partial \Pi_h}{\partial s} = 0$ ), we have

$$s_h^* = \frac{m+2y+1}{2} - \frac{1}{2(1-\lambda)} \text{ and } p_h^* = x + y[\lambda + (1 - \lambda)(2y - m)] \quad (52)$$

Similar to that in the baseline model,  $s_h^* \geq c + m$  if  $m \leq \bar{m}(c) \equiv 2y + 1 - 2c - \frac{1}{1-\lambda}$ . When  $m \leq \bar{m}(c)$ ,  $s_h^*$  in Equation (52) is the optimal solution to the constrained optimization problem for the high-rebate case. By substituting  $s_h^*$  into Equation (51), we derive the resulting profit as

$$\Pi_h^* = 2x + 2\lambda y + \frac{1}{4}[\frac{\lambda}{1-\lambda} + (m - 2y)^2 - \lambda(m - 2y + 1)^2] \quad (53)$$

When  $m > \bar{m}(c)$ , the optimal rebate is  $c + m$ , leading to the optimal second-period price  $p_{2hc}^* = x + 2(c + \lambda - \lambda c)y$  and the optimal profit as follows:

$$\Pi_{hc}^* = 2x + 2\lambda y - [\lambda + (1 - \lambda)c](c + m - 2y) \quad (54)$$

**Globally Optimal Price and Rebate Decisions.** As in the baseline model, based on Equations (50), (53), and (54), we can derive that  $\Pi_n^* \geq \Pi_h^*$  if and only if  $m \geq m_1$ ,  $\Pi_n^* \geq \Pi_{hc}^*$  if and only if  $m \geq m_2$ ,  $\Pi_l^* \geq \Pi_h^*$  if and only if  $m \geq m_3$ , and  $\Pi_l^* \geq \Pi_{hc}^*$  if and only if  $m \geq m_4$ , where

$$\begin{cases} m_1 = 2y + \frac{\lambda - 2\sqrt{2\lambda(1-\lambda)}y}{1-\lambda} \\ m_2 = \frac{2(1-\lambda)cy}{c+\lambda-c\lambda} - c \\ m_3 = 2y + \frac{\lambda - \sqrt{\lambda(1-\lambda)[(2y-2\lambda y+c-1)^2+8y]}}{1-\lambda} \\ m_4 = \frac{[2(1-\lambda)y-c][c(4-3\lambda)+2\lambda(1-(1-\lambda)y)]-\lambda}{4c(1-\lambda)+4\lambda} \end{cases} \quad (55)$$

Notice that  $m_1$  and  $\bar{m}$  intersect at  $\frac{\sqrt{2y\lambda(1-\lambda)}-\lambda}{1-\lambda}$ , which is less than  $\hat{c}$  if and only if  $y \leq \frac{2-\lambda-\sqrt{(4-3\lambda)\lambda}}{4(1-\lambda)^3}$ .

Therefore, we can define  $\hat{m}(c)$  as follows:

$$\left\{ \begin{array}{l} \text{when } y \leq \frac{2-\lambda-\sqrt{(4-3\lambda)\lambda}}{4(1-\lambda)^3}, \quad \hat{m}(c) = \begin{cases} m_1 & \text{if } c \leq c_1 \\ m_2 & \text{if } c_1 < c \leq \hat{c} \\ m_4 & \text{if } \hat{c} < c \end{cases} \\ \text{when } y > \frac{2-\lambda-\sqrt{(4-3\lambda)\lambda}}{4(1-\lambda)^3}, \quad \hat{m}(c) = \begin{cases} m_1 & \text{if } c \leq \hat{c} \\ m_3 & \text{if } \hat{c} < c \leq c_2 \\ m_4 & \text{if } c_2 < c \end{cases} \end{array} \right. \quad (56)$$

where  $m_1, m_2, m_3,$  and  $m_4$  are defined in Equation (55), and

$$\left\{ \begin{array}{l} c_1 = \frac{-\lambda + \sqrt{2\lambda(1-\lambda)y}}{1-\lambda} \\ c_2 = \frac{-[5-2(1-\lambda)y](1-\lambda)\lambda + 2\sqrt{\lambda(1-\lambda)[1+2y(1-\lambda)(2+2y(1-\lambda)^3-3\lambda)]]}{(1-\lambda)(4-5\lambda)} \end{array} \right.$$

are the intersection between  $m_1$  and  $m_2$  and the intersection between  $m_3$  and  $m_4$ , respectively. When  $m < \hat{m}(c)$ , the seller offers a high rebate. Altogether, the equilibrium rebate and price decisions can be summarized as in the proposition.  $\square$

## Proof of Proposition 10

*Proof.* As in the baseline model,  $p_1^* = x + y$  and  $p_2^* = x + 2\hat{\lambda}y$ , where  $\hat{\lambda}$  is a function of  $s$ . For the high-rebate case, because  $n_o = 0$ , we have the same results as in the baseline model. We next consider the low-rebate case ( $0 \leq s < c$ ). As in the baseline model, we have  $\hat{\lambda} = \frac{1-c+s}{2-2c+s}$ , and the seller's profit function is

$$\Pi_l = (x + y) + [x + \frac{2(1-c+s)}{2-2c+s}y] - s \cdot \frac{1}{2}[1 - (c - s)] \quad (57)$$

By the first-order condition (i.e., letting  $\frac{\partial \Pi_l}{\partial s} = 0$ ), we have the optimal rebate to be either 0 or as

$$s_l^* = \{s \in (0, 1) | (1 - c + 2s)(2 - 2c + s)^2 - 4y(1 - c) = 0\} \quad (58)$$

We notice that  $s_l^* > 0$  requires  $c > \hat{c} \equiv 1 - \sqrt{y}$ , and we can verify that  $s_l^* < c$ . When  $c \leq \hat{c}$ , the optimal rebate is 0, the optimal second-period price is  $p_{2n}^* = x + y$ , and the optimal profit is  $\Pi_n^* = 2(x + y)$ . When  $c > \hat{c}$ ,  $s_l^*$  in Equation (58) is the optimal solution to the constrained optimization problem for the low-rebate case. By substituting  $s_l^*$  into Equation (57), we derive the resulting profit as  $\Pi_l^*(s_l^*)$ .

As in the baseline model,  $\Pi_n^* \geq \Pi_h^*$  if and only if  $m \geq m_1$ , and  $\Pi_n^* \geq \Pi_{hc}^*$  if and only if  $m \geq m_2$ , where  $m_1$  and  $m_2$  are defined in Equation (20). Similarly,  $\Pi_l^* \geq \Pi_h^*$  if and only if  $m \geq m_3$ , and  $\Pi_l^* \geq \Pi_{hc}^*$  if and only if  $m \geq m_4$ , where  $m_3 = \{m | \Pi_l^* = \Pi_h^*\}$  and  $m_4 = \{m | \Pi_l^* = \Pi_{hc}^*\}$ . Notice that  $m_1$  and  $\bar{m}$  intersect at  $-1 + \sqrt{2y}$ , which is less than  $\hat{c}$  if and only if  $y < 12 - 8\sqrt{2}$ . Therefore, we can define  $\hat{m}(c)$  as follows:

$$\left\{ \begin{array}{l} \text{when } y < 12 - 8\sqrt{2}, \quad \hat{m}(c) = \begin{cases} m_1 & \text{if } c \leq \sqrt{2y} - 1 \\ m_2 & \text{if } \sqrt{2y} - 1 < c \leq \hat{c} \\ m_4 & \text{if } \hat{c} < c \end{cases} \\ \text{when } y \geq 12 - 8\sqrt{2}, \quad \hat{m}(c) = \begin{cases} m_1 & \text{if } c \leq \hat{c} \\ m_3 & \text{if } \hat{c} < c \leq \tilde{c} \\ m_4 & \text{if } \tilde{c} < c \end{cases} \end{array} \right. \quad (59)$$

where  $\tilde{c} = \{c \in (0, 1) | \bar{m}(c) = m_4\}$ . Consequently, the equilibrium rebate and price decisions can be summarized as in the proposition.  $\square$
